# Supplementary material
Source: publisher figshare collection journal article supplement (https://acs.figshare.com/ndownloader/files/17948720)
Supplement: Supplementary file 1 [file 17948720]

# Supporting Information

## Aggregation Structure of Polycarbosilane

*Yaomin Deng<sup>†</sup>, Ying Zhang<sup>†‡</sup>, Xuan Cheng<sup>†‡\*</sup>, Jingming Yang<sup>†</sup>*

<sup>†</sup> Department of Materials Science and Engineering, College of Materials, Xiamen University, Xiamen, Fujian 361005, China

<sup>‡</sup> Fujian Key Laboratory of Advanced Materials (Xiamen University), Xiamen, Fujian 361005, China

\* Corresponding Author: X. Cheng (xcheng@xmu.edu.cn)

The pore volume of micropores with pore widths less than 2 nm were calculated based on the N<sub>2</sub> adsorption-desorption isotherm of PCS2 according to several methods including density functional theory (DFT), non-local density functional theory (NLDFT), Horvath-Kawazoe (H-K), Dubinin-Astakhov (D-A), Dubinin-Radushkevich (D-R), t-plot and MP, respectively. The selected models with hypothesis of pore shapes and the obtained pore volumes were summarized in Table S1.

**Table S1.** Pore volume of micropores calculated based on different methods with corresponding hypothesis of pore shape

| Method | hypothesis of pore shape | Pore volume(cm <sup>3</sup> /g) |
|--------|--------------------------|---------------------------------|
| DFT    | slit                     | 0.0003(6)                       |
| NLDFT  | slit                     | 0.0005(8)                       |
| H-K    | slit                     | 0.0014(5)                       |
| D-A    | slit                     | 0.0019(1)                       |
| D-R    | /                        | 0.0009(6)                       |
| t-plot | /                        | /                               |
| MP     | cylinder                 | 0                               |
